# Supplementary material
Source: publisher site journal article supplement (https://www.dovepress.com/article/547740)

## **Supplementary Material**

**Table S1: Search strategies**

| <b>PubMed search strategies (Mar 26, 2024) = 80</b>                                                                                                                                                                                                                                                                                                                                                                                                                                                                                                                                                                                                                                                                                                                                                                                                                                                                                                                                                                                                                        |
|----------------------------------------------------------------------------------------------------------------------------------------------------------------------------------------------------------------------------------------------------------------------------------------------------------------------------------------------------------------------------------------------------------------------------------------------------------------------------------------------------------------------------------------------------------------------------------------------------------------------------------------------------------------------------------------------------------------------------------------------------------------------------------------------------------------------------------------------------------------------------------------------------------------------------------------------------------------------------------------------------------------------------------------------------------------------------|
| <p>#1 "Anesthesia And Analgesia"[Mesh] OR "Anesthesia, Inhalation"[Mesh] OR "Anesthesia, General"[Mesh] OR "Anesthesia"[Mesh] OR "Auxiliary Anesthesia"[Title/Abstract] OR "Acupuncture Anesthesia "[Title/Abstract] OR "Adjunct Anesthesia "[Title/Abstract]</p> <p>#2 (((((Laparoscope[Title/Abstract]) OR (Celioscope[Title/Abstract])) OR (Peritoneoscope[Title/Abstract])) OR (Laparoscopic[Title/Abstract])) OR (Celioscopic[Title/Abstract])) OR ("Laparoscopy"[Mesh] OR "Cholecystectomy, Laparoscopic"[Mesh] OR "Hand-Assisted Laparoscopy"[Mesh])</p> <p>#3 "Acupuncture And Moxibustion "[Title/Abstract] OR "Acupuncture"[Mesh] OR "Acupuncture Therapy"[Mesh] OR "Acupuncture, Ear"[Mesh] OR "Acupuncture Points"[Mesh] OR "Acupuncture Analgesia"[Mesh] OR "Electroacupuncture "[Title/Abstract] OR "Electric Stimulation"[Mesh] OR "Electric Stimulation Therapy"[Mesh] OR "Transcutaneous Electric Nerve Stimulation"[Mesh] OR "TEAS "[Title/Abstract] OR "Transcutaneous Electrical Acupoint Stimulation "[Title/Abstract]</p> <p>#4 #1 AND #2 AND #3</p> |
| <b>Web of Science search strategies (Mar 26, 2024) = 49</b>                                                                                                                                                                                                                                                                                                                                                                                                                                                                                                                                                                                                                                                                                                                                                                                                                                                                                                                                                                                                                |
| <p>#1 (TS=(Acupuncture And Moxibustion) OR TS=(Acupuncture) OR TS=(Acupuncture Therapy) OR TS=(Acupuncture Analgesia) OR TS=(Electroacupuncture) OR TS=(Transcutaneous Electrical Acupoint Stimulation) OR TS=(TEAS) OR TS=(Ear Acupuncture) OR TS=(Electrical Stimulation) OR TS=(Acupuncture Points) OR TS=(Electric Stimulation Therapy)) NOT (SILOID=="PPRN"))</p> <p>#2 (TS=(Auxiliary Anesthesia) OR TS=(Adjunct Anesthesia) OR TS=(Narcosis) OR TS=(Anesthesia And Analgesia) OR TS=(Anesthesia) OR TS=(Acupuncture Anaesthesia) OR TS=(Acupuncture Analgesia)) NOT (SILOID=="PPRN"))</p> <p>#3 (TS=(Laparoscope) OR TS=(Celioscope) OR TS=(Peritoneoscope) OR TS=(Laparoscopic) OR TS=(Celioscopic)) NOT (SILOID=="PPRN"))</p> <p>#4 #1 AND #2 AND #3</p>                                                                                                                                                                                                                                                                                                          |

**EMBASE search strategies (Mar 26, 2024) =17**

#1 ((Acupuncture and Moxibustion) OR Acupuncture OR Acupuncture Therapy OR Acupuncture Analgesia OR Electroacupuncture OR Transcutaneous Electrical Acupoint Stimulation OR TEAS OR Ear Acupuncture OR Electrical Stimulation OR Acupuncture Points OR Electric Stimulation Therapy)

#2 (Auxiliary Anesthesia OR Adjunct Anesthesia OR Narcosis OR Anes\* OR Acupuncture Anaesthesia OR Acupuncture Analgesia)

#3 (Laparoscope)

#4 #1 AND #2 AND #3

**Cocharne search strategies (Mar 26, 2024) =12**

#1 MeSH descriptor: [Acupuncture] explode all trees

#2 MeSH descriptor: [Acupuncture Therapy] explode all trees

#3 MeSH descriptor: [Acupuncture Analgesia] explode all trees

#4 MeSH descriptor: [Electroacupuncture] explode all trees

#5 MeSH descriptor: [Acupuncture, Ear] explode all trees

#6 MeSH descriptor: [Electrical Stimulation] explode all trees

#7 MeSH descriptor: [Acupuncture Points] explode all trees

#8 MeSH descriptor: [Electric Stimulation Therapy] explode all trees

#9 (Acupuncture And Moxibustion):ti,ab,kw OR (Transcutaneous Electrical Acupoint Stimulation):ti,ab,kw OR (TEAS):ti,ab,kw (Word variations have been searched)

#10 #1 OR #2 OR #3 OR #4 OR #5 OR #6 OR #7 OR #8 OR #9

#11 MeSH descriptor: [Narcosis] explode all trees

#12 MeSH descriptor: [Anesthesia And Analgesia] explode all trees

#13 MeSH descriptor: [Anesthesia] explode all trees

#14 MeSH descriptor: [Acupuncture Analgesia] explode all trees

#15 (Auxiliary Anesthesia):ti,ab,kw OR (Adjunct Anesthesia):ti,ab,kw OR (TEAS):ti,ab,kw OR (Acupuncture Anaesthesia):ti,ab,kw (Word variations have been searched)

#16 #11 OR #12 OR #13 OR #14 OR #15

#17 MeSH descriptor: [Laparoscope] explode all trees

#18 #10 AND #16 AND #17

**CNKI search strategies (Mar 26, 2024) = 112**

(SU= acupuncture + acupuncture needling + acupuncture therapy + acupuncture analgesia + electroacupuncture + transcutaneous electrical acupoint stimulation + auricular acupuncture + acupoint\* + electrical stimulation + electrotherapy) AND (SU= assisted anesthesia + anesthesia + acupuncture anesthesia) AND (SU= laparoscop\*)

**Wanfang Database search strategies (Mar 26, 2024) = 132**

(SU= acupuncture OR acupuncture needling OR acupuncture therapy OR acupuncture analgesia OR electroacupuncture OR transcutaneous electrical acupoint stimulation OR auricular acupuncture OR acupoint\* OR electrical stimulation OR electrotherapy) AND (SU= assisted anesthesia OR anesthesia OR acupuncture anesthesia) AND (SU= laparoscop\*)

**VIP search strategies (Mar 26, 2024) = 124**

(Title or Keywords:(acupuncture OR acupuncture needling OR acupuncture therapy OR acupuncture analgesia OR electroacupuncture OR transcutaneous electrical acupoint stimulation OR auricular acupuncture OR acupoint\* OR electrical stimulation OR electrotherapy)) AND (Title or Keywords:( assisted anesthesia OR anesthesia OR acupuncture anesthesia)) AND (Title or Keywords: (laparoscop\*))

**CBM search strategies (Mar 26, 2024) = 233**

("acupuncture"[Common Fields: Intelligent] OR "acupuncture needling"[Common Fields: Intelligent] OR "acupuncture therapy"[Common Fields: Intelligent] OR "acupuncture analgesia"[Common Fields: Intelligent] OR "electroacupuncture"[Common Fields: Intelligent] OR "transcutaneous electrical acupoint stimulation"[Common Fields: Intelligent] OR "auricular acupuncture"[Common Fields: Intelligent] OR "acupoint\*"[Common Fields: Intelligent] OR "electrical stimulation"[Common Fields: Intelligent] OR "electrotherapy"[Common Fields: Intelligent]) AND ("assisted anesthesia"[Common Fields: Intelligent] OR "anesthesia"[Common Fields: Intelligent] OR "acupuncture anesthesia"[Common Fields: Intelligent] OR "acupuncture anesthesia"[Common Fields: Intelligent]) AND "laparoscop\*"[Common Fields: Intelligent]

**Table S2: The certainty evidence of included studies**

| Outcomes                                   | Relative effect<br>(95% CI) | N   | Certainty of<br>the evidence<br>(GRADE) |
|--------------------------------------------|-----------------------------|-----|-----------------------------------------|
| 1.VAS scores at<br>postoperative 2 hours   | -0.75 [-1.07, -0.44]        | 160 | ⊕⊕⊕⊕<br>High                            |
| 2. VAS scores at<br>postoperative 12 hours | -0.97 [-1.10, -0.84]        | 432 | ⊕⊕⊕⊕<br>High                            |
| 3. VAS scores at<br>postoperative 24 hours | -1.00 [-1.47, -0.53]        | 532 | ⊕⊕⊕○<br>moderate                        |
| 4. PONV at 6 hours                         | 0.65 [0.50, 0.85]           | 416 | ⊕⊕⊕⊕<br>High                            |
| 5.PONV at 24 hours                         | 0.46 [0.36, 0.57]           | 836 | ⊕⊕⊕⊕<br>High                            |
| 6. PONV at 48 hours                        | 0.50 [0.21, 1.22]           | 516 | ⊕⊕⊕⊕<br>High                            |
| 7. PONV without specific<br>temporal       | 0.41 [0.25, 0.68]           | 543 | ⊕⊕⊕○<br>moderate                        |

|                                 |                          |      |                  |
|---------------------------------|--------------------------|------|------------------|
| 8. IL-6                         | -11.15 [-19.90, -2.41]   | 273  | ⊕⊕⊕○<br>moderate |
| 9. IL-10                        | 3.35 [-0.47, 7.17]       | 180  | ⊕⊕⊕○<br>moderate |
| 10. TNF- $\alpha$               | -2.71 [-3.19, -2.23]     | 173  | ⊕⊕⊕⊕<br>High     |
| 11. Time to first flatus        | -9.93 [-16.30, -3.55]    | 256  | ⊕⊕⊕○<br>moderate |
| 12. Dosage of Propofol          | -89.65 [-136.41, -42.88] | 1163 | ⊕⊕⊕○<br>moderate |
| 13. Dosage of Fentanyl          | -0.05 [-0.07, -0.03]     | 358  | ⊕⊕⊕○<br>moderate |
| 14. Dosage of Sufentanil        | -2.77 [-8.48, 2.95]      | 309  | ⊕⊕⊕○<br>moderate |
| 15. Dosage of Remifentanyl      | -89.09 [-126.65, -51.53] | 812  | ⊕⊕⊕○<br>moderate |
| 16. Dosage of Vecuronium        | -1.36 [-2.37, -0.35]     | 322  | ⊕⊕⊕⊕<br>High     |
| 17. postoperative analgesic use | -22.93 [-32.00, -13.86]  | 142  | ⊕⊕⊕⊕<br>High     |

**Notes:** GRADE Working Group grades of evidence:

High certainty ( $\oplus\oplus\oplus\oplus$ ): We are very confident that the true effect lies close to that of the estimate of the effect;

Moderate certainty ( $\oplus\oplus\oplus\circ$ ): We are moderately confident in the effect estimate: The true effect is likely to be close to the estimate of the effect, but there is a possibility that it is substantially different;

Low certainty ( $\oplus\oplus\circ\circ$ ): Our confidence in the effect estimate is limited: The true effect may be substantially different from the estimate of the effect

Very low certainty ( $\oplus\circ\circ\circ$ ): We have very little confidence in the effect estimate: The true effect is likely to be substantially different from the estimate of effect

**Abbreviations:** CI, confidence interval; VAS, Visual Analogue Scale; PONV, postoperative nausea and vomiting; IL-6, interleukin-6; IL-10, interleukin-10; TNF- alpha, tumor necrosis factor-alpha.

**Figure S1:** Publication bias for VAS scores at postoperative 12 hours

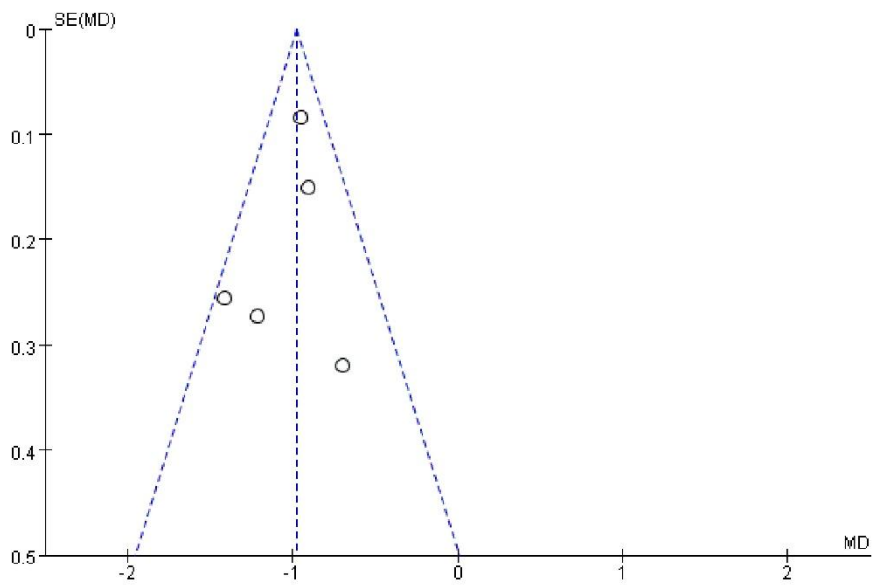

**Figure S2:** Publication bias for VAS scores at postoperative 24 hours

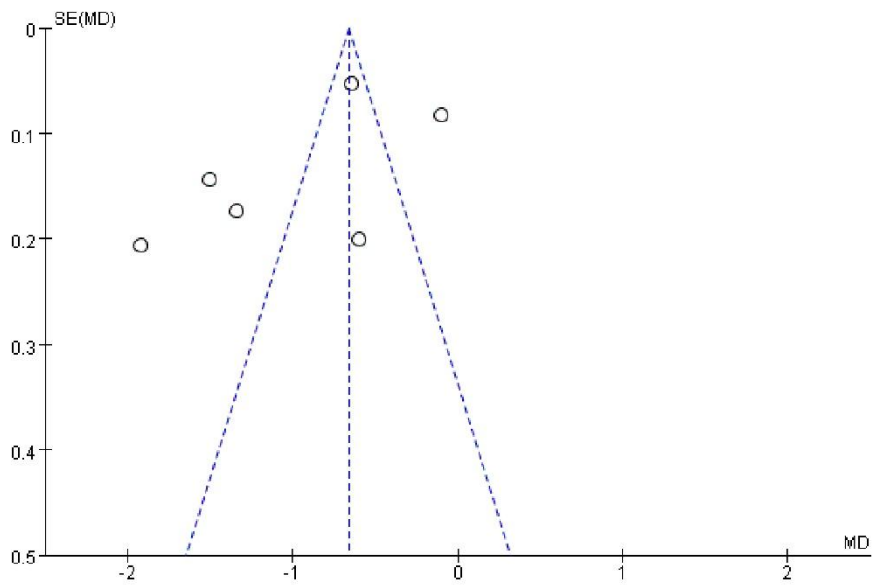

Supplement: Supplementary file 1 [file 547740%20Revised%20Supplementary%20material.pdf]
